# Supplementary material for: Multi-omics analysis of human mesenchymal stem cells shows cell aging that alters immunomodulatory activity through the downregulation of PD-L1
Source: PubMed Central journal article supplement (PMC10359415; doi:10.1038/s41467-023-39958-5), 2023-07-20
Supplement: 41467_2023_39958_MOESM3_ESM.pdf [file 41467_2023_39958_MOESM3_ESM.pdf]

## **Description of Additional Supplementary Files**

Name: Supplementary Data 1

Description: Basic information for MSCs sample donors and scRNA-seq analysis.

Name: Supplementary Data 2

Description: Pseudobulk DEGs of each MSC cluster.

Name: Supplementary Data 3

Description: Lists of genes used in gene set analysis

Name: Supplementary Data 4

Description: Results for GSVA analysis

Name: Supplementary Data 5

Description: Regulon targets information for SCENIC analysis

Name: Supplementary Data 6

Description: Results of generalized linear model (GLM) analysis

Name: Supplementary Data 7

Description: Differentially expressed Proteins on MSC EVs Proteome level.

Name: Supplementary Data 8

Description: Pseudobulk DEGs of each young and aged BM-MSC cluster.

Name: Supplementary Data 9

Description: Results of generalized linear model (GLM) analysis in Fig. S5h

Name: Supplementary Data 10

Description: Differentially expressed Proteins or Genes on MSC Proteome level or pseudobulk scRNA level.

Name: Supplementary Data 11

Description: Results of 2D enrichment analysis.

Name: Supplementary Data 12

Description: Supporting information for Fig. 6e.

Name: Supplementary Data 13

Description: Sequences of primers and shRNA.
